# Supplementary material for: A Practical, One-Clinic Visit Protocol for Pharmacokinetic Profile Generation with the ADVATE myPKFiT Dosing Tool in Severe Hemophilia A Subjects
Source: PubMed Central journal article supplement — Thromb Haemost. 2021 Jan 27;121(10):1326–36. doi: 10.1055/a-1376-0970 (PMC8494515; doi:10.1055/a-1376-0970), 2021-01-27
Supplement: 10-1055-a-1376-0970-s200529.pdf [file 10-1055-a-1376-0970-s200529.pdf]

## **Supplementary Material**

A practical, one-clinic visit protocol for pharmacokinetic profile generation with the ADVATE<sup>®</sup> myPKFiT<sup>®</sup> dosing tool in severe hemophilia A subjects

V.S. Blanchette, L. Zunino, V. Grassmann, C. Barnes, M.D. Carcao, J. Curtin, S. Jackson, L. Khoo, V. Komrska, D. Lillicrap, M. Morfini, G. Romanova, D. Stephens, E. Zapotocka, M.L. Rand, J. Blatny

**Supplementary Table 1:** Agreements between the washout, 6-sampling time point and the no-washout, single-clinic visit 2 time-point PK protocols for the PK parameter volume of distribution at steady state generated using the ADVATE<sup>®</sup> myPKFiT<sup>®</sup> dosing tool and Factor VIII:C levels\*.

|                          | PK parameter            | One-stage Assay    | Chromogenic Assay  |
|--------------------------|-------------------------|--------------------|--------------------|
|                          |                         | ICC (95% CI)       | ICC (95% CI)       |
| All participants (n=35)  | V <sub>ss</sub> (dL/kg) | 0.47 (0.17, 0.69)  | 0.47 (0.17, 0.69)  |
| O Blood Group (n=12)     | V <sub>ss</sub> (dL/kg) | 0.50 (-0.07, 0.83) | 0.49 (-0.09, 0.82) |
| Non-O Blood Group (n=20) | V <sub>ss</sub> (dL/kg) | 0.43 (-0.00, 0.73) | 0.50 (0.08, 0.77)  |

Abbreviations: PK, pharmacokinetic; V<sub>ss</sub>, volume of distribution at steady state.

\*Factor VIII:C determinations done in central laboratory

Note: Data for 35/39 subjects were available for analysis: the ADVATE<sup>®</sup> myPKFiT<sup>®</sup> application was unable to generate PK parameters for the 2-point PKs of four subjects (2 subjects had doses <10IU/kg which is outside the allowable range of 10-100 IU/kg for the dosing tool), 1 subject had technical issues with the FVIII:C samples and 1 subject did not have adequate documentation of the FVIII infusion prior to the clinic visit for the 2-sampling time point PK study). Blood group status was not available for 3 subjects.

**Supplementary Table 2:** Agreements between the washout, 6 sampling time point and the no washout, single clinic visit 2 time-point PK protocols for PK parameters generated using the myPKFiT<sup>®</sup> dosing tool and Factor VIII:C levels measured in the local laboratories.

|                            | PK parameter                        | One-stage Assay    |
|----------------------------|-------------------------------------|--------------------|
|                            |                                     | ICC (95% CI)       |
| All participants<br>(n=31) | Cl (mL/hr/kg)                       | 0.77 (0.58, 0.88)  |
|                            | t <sup>1</sup> / <sub>2</sub> (hrs) | 0.91 (0.82, 0.95)  |
|                            | V <sub>ss</sub> (dL/kg)             | 0.49 (0.17, 0.72)  |
| O Group<br>(n=11)          | Cl (mL/hr/kg)                       | 0.48 (-0.13, 0.83) |
|                            | t <sup>1</sup> / <sub>2</sub> (hrs) | 0.43 (-0.19, 0.81) |
|                            | V <sub>ss</sub> (dL/kg)             | 0.42 (-0.20, 0.80) |
| Non-O Group<br>(n=18)      | Cl (mL/hr/kg)                       | 0.85 (0.63, 0.94)  |
|                            | t <sup>1</sup> / <sub>2</sub> (hrs) | 0.95 (0.87, 0.98)  |
|                            | V <sub>ss</sub> (dL/kg)             | 0.46 (0.00, 0.76)  |

Data for 31/39 subjects were available for analysis: the local results was not provided for 4 patients (3 from the same site), the myPKFiT<sup>®</sup> application was unable to generate PK parameters for the 2-point PKs of 4 subjects (2 subjects had doses <10IU/kg which is outside the allowable range of 10-100 IU/kg for the dosing tool, 1 subject had technical issues with the FVIII:C samples and 1 subject did not have adequate documentation of the FVIII infusion prior to the clinic visit for the 2 sampling time point PK study). Blood group was not available for 2 subjects.

**Supplementary Fig. 1:** Spaghetti plots showing, in the same subjects, the PK parameter of volume of distribution at steady state\* generated using the myPKFiT<sup>®</sup> dosing tool and Factor VIII:C levels from the washout, 6-sampling time point and the no-washout, single-clinic visit 2 time-point PK protocols. a, All participants (n=35); b, Subjects with O blood group (n=12); c, Subjects with non-O blood group (n=20).

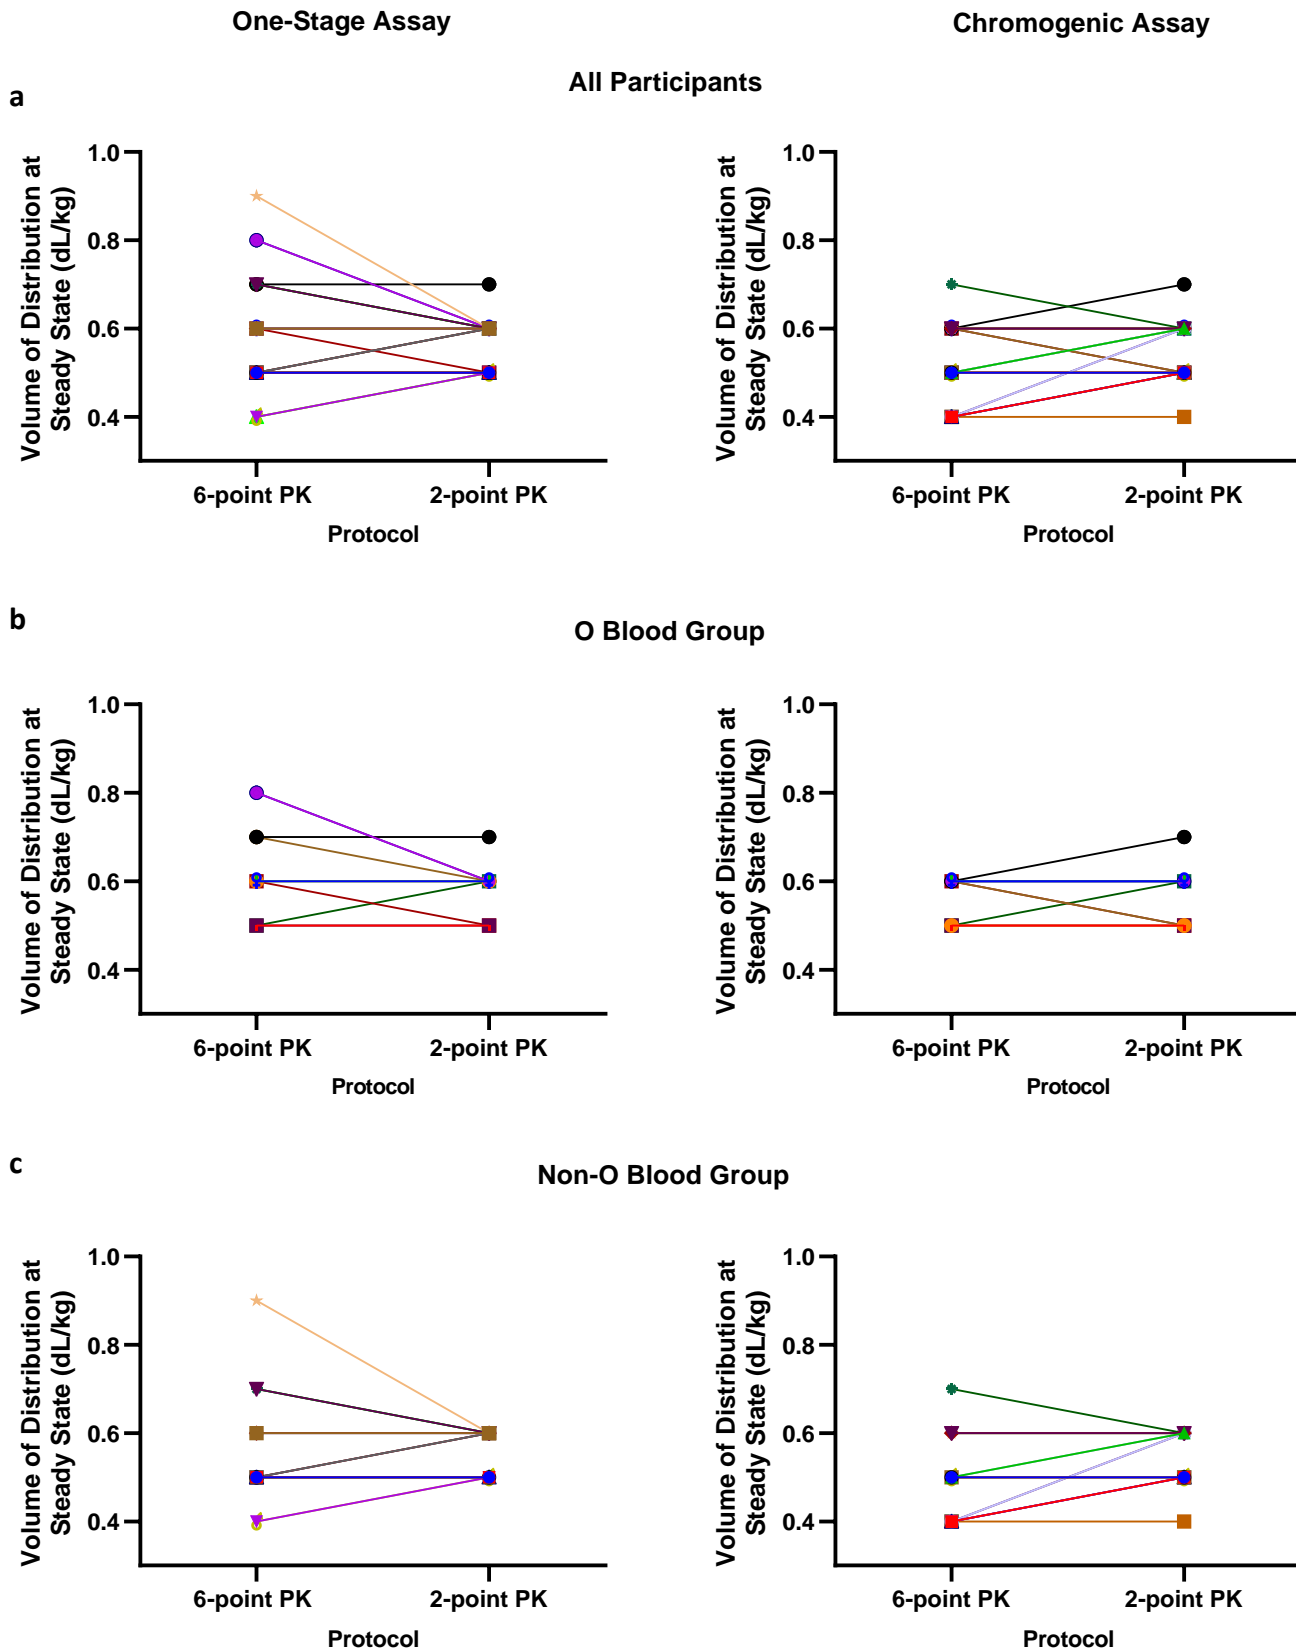

\*For volume of distribution, many of the lines joining the values for the 6- and 2-point PK protocols are superimposed, hence, the fewer apparent lines on these plots.

**Supplementary Fig. S2:** One-stage and chromogenic assay FVIII:C levels at pre-, and 1hr, 3hr, 9hr, 24hr and 48hr post-infusion from the 6-point PK studies. Data are presented as means  $\pm$  standard error of the means; \* $p < 0.001$  and \*\* $p < 0.0001$ .

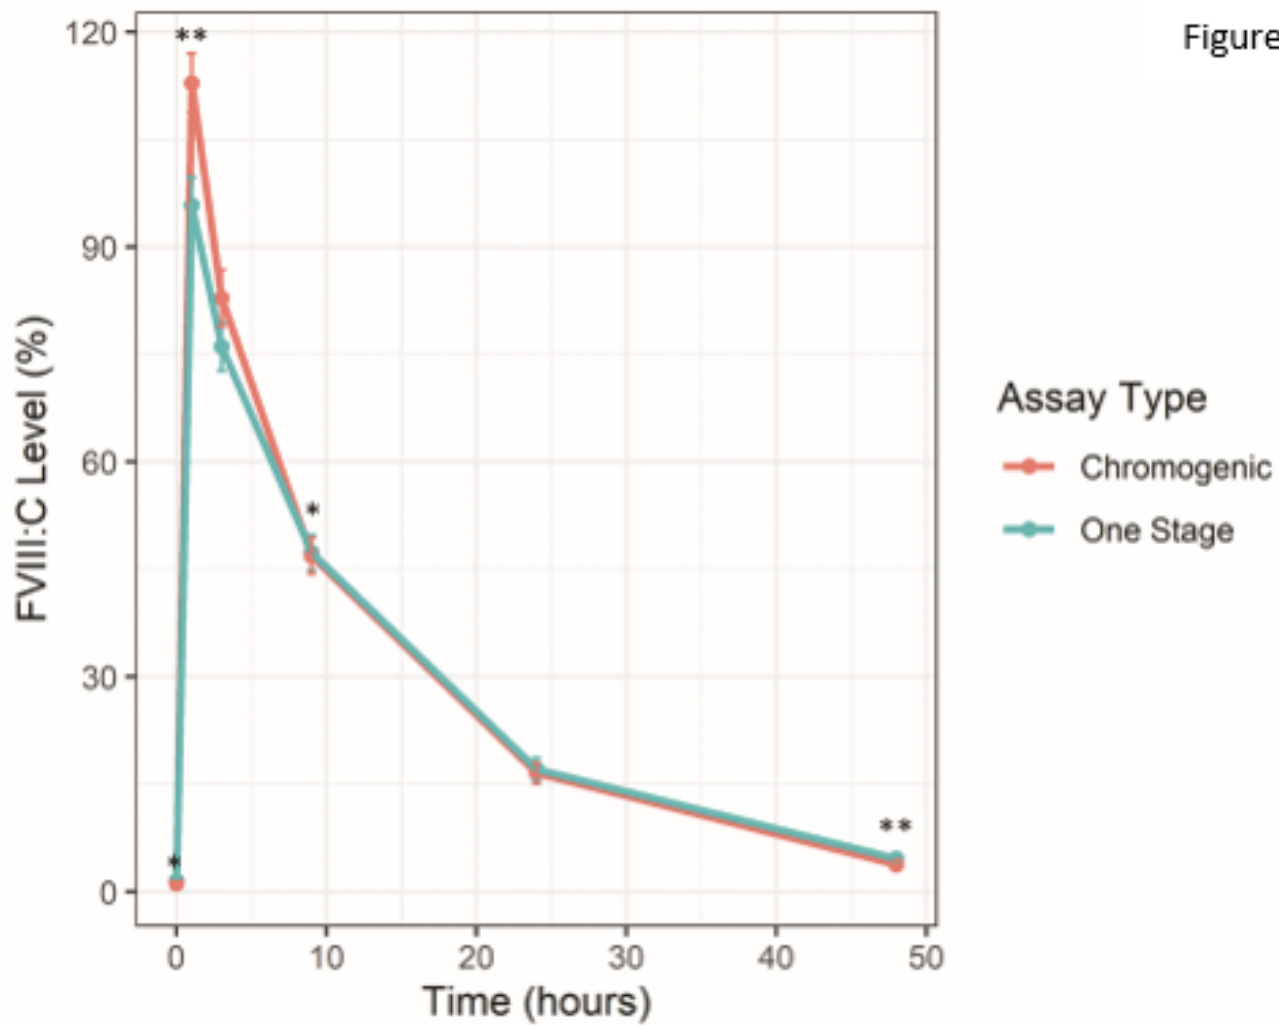

Figure 2
